# Supplementary material for: Coronavirus Disease 2019 and the Thyroid - Progress and Perspectives
Source: Front Endocrinol (Lausanne). 2021 Jun 24;12:708333. doi: 10.3389/fendo.2021.708333 (PMC8279745; doi:10.3389/fendo.2021.708333)
Supplement: Supplementary file 2 [file Table_1.xlsx]

## Sheet: s1
Supplementary Table 1 The similarities and dissimilarities in thyroid insults between SARS and COVID-19
	SARS	References	COVID-19	References
	Severe acute respiratory distress syndrome due to SARS-CoV infection is thought to have caused so-called non-thyroidal-illness syndrome (NTIS).	34	Severe acute respiratory distress syndrome due to SARS-CoV-2 infection is thought to have caused so-called non-thyroidal-illness syndrome (NTIS).	17, 19, 20, 21, 22
	Thyroid-stimulating hormone (TSH) and adrenocorticotropin (ACTH) staining in the thyro- and corticotrophs, respectively, was significantly attenuated in the pituitary gland of patients with SARS.	34	Elevated serum levels of cortisol in patients with COVID-19 were reported [61], and hypercortisolism has been reported to suppress TSH levels [23, 62]. Under such conditions, lowering the serum levels of FT3 and FT4 was well expected.	60, 23, 61
	Apoptosis of the thyroid follicular cells was apparent in SARS, but the information on autopsy specimen of patients with SARS having hypothyroidism have been unavailable.	36	The pathological findings in the three cases of COVID-19 were essentially the same as those in patients with SARS-CoV, i.e., apoptosis of follicular cells in the absence of the virus itself in the thyrocytes.	67
	SARS-CoV has not been found in the thyroid gland by immunohistochemistry and in situ hybridization analysis.	37
	Proinflammatory/Th1 cytokine production is increased.	65	Proinflammatory/Th1 cytokine production is increased and Th2 cytokines increased as well.	2
			Among patients with COVID-19, a significant positive correlation between serum IL-6 levels and the degree of thyrotoxicosis was reported.	24

## Sheet: s2
Supplementary Table 2. Thyroid diseases with COVID-19
	Diagnosis	No. of patients	Age and Gender	Onset (before/after the COVID-19)	Symptoms of inflammation	Laboratory data				Ultrasonography		Scintigraphy	References
			Young, Middle-aged, Elderly, Male-dominant, Female-dominant, neutral		Neck pain, fever, or tenderness	CRP/ESR increase	Thyroid function: Eu-, Hyper- or Hypothyroid, or Thyrotoxicosis, others	TRAb	TgAb or TPOAb	Focal/diffuse hypoechogenic area Yes/No/Combined	Incresed vascularity Yes/No/Combined	Radioiodine or technetium uptake
	SAT	13, see Supplementary Table 3	Young and Middle aged, female-dominant	‘7 weeks before’ to ‘7 weeks after’	Yes	Yes	Thyrotoxicosis	-ve	-ve	Combined	No	Decreased	7-16
	GD	3	Young and Middle aged, possibly female dominant.	between 16 to 65 days after	No	No	Hyperthyroidism	+ve	+ve	N/A	N/A	Increased	25, 26
	HT	1	Middle aged, possibly neutral.	7 days after	No	No	Hypothyroid	N/A	+ve	N/A	N/A	N/A	27
	PPT	1	Young, female-only.	35 days after	No	No	Thyrotoxicosis	-ve	+ve	No	No	N/A	28
	Atypical SAT	14 (in both high-intensive care unit and low-intensive care unit)	Middle-aged and elderly, 64% male and 36% female.	1 day after	No	Yes	Thyrotoxicosis	-ve	-ve (N = 8)* +ve (N = 1)*	Focal hypoechogenic areas	N/A	Decreased	29
	NTIS	See Supplementary Table 4	Any age and gender	During COVID-19	N/A	N/A	Low FT3 and unchanged TSH and FT4.(TSH may be lowered in those already receiving glucocorticoid for the treatment of COVID.)	N/A	N/A	N/A	N/A	N/A	See Supplementary Table 4
	Footnotes:
	CRP, C-reactive protein; ESR, erythrocyte sedimentation rate; TRAb, anti-TSH receptor autoantibodies; TgAb, anti-thyroglobulin-antibodies; TPOAb, anti-thyroperoxidase antibodies; L-T4, oral L-thyroxine replacement therapy
	M, male; F, female; SAT, subacute thyroiditis; GD, Graves' disease; HT, Hashimoto's thyroiditis; -ve, Negative; +ve, Positive; N/A, not applicable, and cases without examinations were excluded.
	TSH, thyrotropin; FT3, free tri-iodothyronine; FT4, free thyroxine; NTIS, non-thyroidal-illness syndrome;
	* Measured at initial follow-up (18-68 days after baseline mesurement on admission)

## Sheet: s3
Supplementary Table 3. Cases of subacute thyroiditis with COVID-19
	Case	Place where reported	Anthropometry		Onset (days after COVID-19)	Symptoms				Laboratory data									Imaging	Pre-existed thyroid disease	Treatment	References
			Age	Gender		General	Neck pain/tenderness	Body temperature	Palpitation	TSH	FT3 (or total T3 as indicated)	FT4	FT3 to FT4 ratio	Tg	CRP/ESR	TRAb	TgAb	TPOAb
	1	Italy	38	F	16	Asthenia, Anorexia	Yes	38.5C	Yes	0.1 mIU/ml (0.4-4.5)	8.0 pmol/l (2.3-4.2)	29.3 pmol/l (6-16)	0.273038	75.3 µg/l (<35)	High	-ve	-ve	-ve	Incrased volume (20 ml), bilateral diffuse hypoechoic areas, no flow in US	No	PSL 25mg/day	7
	2	Italy	29	F	30	Asthenia, Sweating	Yes	37.2C	Yes	<0.01 mIU/ml (0.4-4.5)	8.9 pmol/l (2.3-4.2)	31.8 pmol/l (6-16)	0.279874	80 µg/l (<35)	High	-ve	38 IU/ml (<30)	-ve	Incrased volume (22 ml), bilateral diffuse hypoechoeic areas, no flow US, absent 99mTc uptake	No	PSL 25mg/day and Propranolol 40mg/day	7
	3	Italy	29	F	36	Sweating	Yes	ND	Yes	ND	ND	ND	ND	ND	ND	ND	ND	ND	Increased volume (25 ml), bilateral diffuse hypoechoic areas in US	Small diffuse nontoxic goiter	Ibuprofen 600mg/day, later L-T4 was commenced due to subclinical hypothyroidism	7
	4	Italy	46	F	20	Asthenia, Insomnia, Anxiety, Weight loss	Yes	37.2C	Yes	<0.01 mIU/ml (0.4-4.5)	6.9 pmol/l (2.3-4.2)	27.8 pmol/l (6-16)	0.248201	ND	High	-ve	ND	ND	Increased volume (18 ml), bilateral diffuse hypoechogenicity, no to mild flow in US	No	PSL 25mg/day	7
	5	Turkey	41	F	1	ND	Yes	38.5C	Yes	<0.008 mIU/l	7.7 pmol/l (3.1-6.8)	25.7 pmol/l (12-21)	0.299611	ND	High	-ve	-ve	-ve	Heterogeneous parenchyma, and decreased flow in US	No	PSL 16mg/day	8
	6	Italy	69	F	5	Insominia, Agitation	No *1	ND	Yes	0.08 mIU/l (0.27-4.2)	5.5 pg/ml (2-4.4)	24.6 pg/ml (0.3-17)	0.223577	187 µg/l (3.5-77)	ND	-ve	-ve	-ve	Enlarged hypoechogenicity, decreased vascularity in US, absent 99mTc uptake	A 30mm of homogeneous nodule	M-PSL i.v. 40mg x 3 days, then oral PSL 25mg/day	9
	7	Italy	18	F	17	Fatigue	Yes	37.5C	Yes	<0.04 mIU/l (0.5-4.1)	8.7 pmol/l (4.6-8.4)	27.2 pmol/l (11-23)	0.31	5.6 µg/l	High	-ve	-ve	-ve	Multiple diffuse hypoechoic areas in US	No	PSL 25mg/day	10
	8	Italy	43	F	45	Fatigue, Tremor	Yes	37.5C	Yes	0.006 mIU/l (0.27-4.2)	7.03 pg/ml (1.71-3.71)	2.69 ng/dl (0.7-1.48)	0.26	188 pg/ml (0-40)	High	-ve	-ve	-ve	Diffuse enlarged hypoechogenicity in US, reduced 99mTc uptake	No	PSL 25mg/day	11
	9	Mexico	37	F	30	None*	Yes	ND	No *1	Undetectable	Total T3 211 ng/dl (mentioned as 'hyperthyroidism')	1.6 ng/dl (mentioned as 'hyperthyroidism')	ND	ND	High	-ve	-ve	-ve	No uptake in iodide scintigram	No	None	12
	10	Singapore	34	M	9	Tachycardia	Yes	ND	Yes	<0.01 mIU/l (0.65-3.70)	13.4 pmol/l (3.2-5.3)	41.8 pmol/l (8.8-14.4)	0.320574	ND	High	-ve	ND	-ve	Low echogenicity in the left lobe, reduced flow in both lobes in US	No	PSL 20 mg/day and Atenolol 25mg/day	13
	11	Philippines	47	F	-35	ND	Yes	ND	Yes	0.05 mIU/ml (0.47-4.68)	Total T3 1.4 ng/ml (0.97-1.69)	1.68 ng/l (0.78-2.19)	ND	ND	High	-ve	-ve	-ve	Slightly enlarged right thyroid lobe and a normal-sized left thyroid lobe, with heterogenous echogenicity and normal vascularity in both lobes.	No clear	Mefenamic acid and then switched to celecoxib.	14
	12	India	58	M	-2	Increased frequency of stools	Yes	37.6C	No, but a pulse rate was 104 beats /min	<0.005 mIU/l (0.27-4.2)	Total T3 2.88 ng/ml (0.80-2.0)	Total T4 20.11 µg/dl (5.10-14.1)	ND	ND	High	-ve	ND	-ve	Diffuse bilateral enlargement of thyroid with hypoechogenicity and increased vascularity in US, poor 99mTc uptake	No	PSL 30mg/day and Propranorol 40mg/day. One month after discharge, L-T4: 50µg/day was commenced due to hypothyroidism.	15
	13	USA	29	F	35	Sweating, body weight loss, shortness of breath, and tremors	Yes	38.9C	No, but a pulse rate was 130 beats /min	0.01 mU/l	Total T3 374 ng/dl (80-150)	4.4 ng/dl (0.6-1.3)	ND	ND	High	-ve	ND	-ve	Heterogeneously enlarged thyroid gland	No	PSL 40 mg/day and Atenolol 50mg/day	16
	Footnotes:
	No, number; TSH, thyrotropin; FT3, free tri-iodothyronine; FT4, free thyroxine; Tg, thyroglobulin; CRP, C-reactive protein; ESR, erythrocyte sedimentation rate
	TRAb, anti-TSH receptor autoantibodies; TgAb, anti-thyroglobulin-antibodies; TPOAb, anti-thyroperoxidase antibodies; L-T4, oral L-thyroxine supplemental therapy
	M, male; F, female; -ve, negative; +ve, positive; ND, not determined, or not described; M-PSL i.v., intravenous Methylprednisolone; PSL, oral prednisolone; US, ultrasound examination; minus values for the onset indicate thyroid disorders developed prior to COVID-19.
	* Under treatment with high-dose painkillerers, including tramadol, acetaminophen, and low dose morphine.
	Note that the units in thryoid hormone have been corrected according to the reference range (case 11 and 13).
																							P

## Sheet: s4
Supplementary Table 4. Summary of alteration of the thyroid functionality in COVID-19
	No.	Place where reported	Study design	Number of participants	Objective	Examination after admission	Main results	CRP/ESR/IL-6	TRAb	TgAb	TPOAb	Pre-existed thyroid diseases	Treatment and Outcomes	References
	1	China	Retrospective	149	Inpatients	Day 1	41/149 (28%) patients with COVID-19 were diagnosed as NTIS.	CRP and ESR levels were significantly higher in NTIS patients than in non-NTIS patients.	ND	ND	ND	Excluded	NTIS patients had more severe events than those of non-NTIS patients.	19
	2	China	Retrospective	100	Inpatients	Day 1	66/100 (66%) patients with COVID-19 were in severe or critically ill.	CRP and IL-6 levels were increased in severely or critically ill patients.	ND	ND	ND	Excluded	No specific treatments	20
	3	China	Consecutive	274	Inpatients	ND	TSH and FT3 levels were significantly lower in deceased patients (n=113) compared with recovered patients (n=161).	CRP/ESR/IL-6 levels were significantly increased in deceased patients.	ND	ND	ND	Not clear	ND	21
	4	China	Retrospective	50	Inpatients excluding mild patients.	Within 48 hours	28/50 (56%) patients had low TSH levels. Total T3 levels were inversely correlated with the severity of COVID-19. Notably, 62% received glucocorticoid treatment	ND	ND	ND	ND	Excluded	ND	22
	5	China	Cross-sectionally	191	Inpatients	Day 1	25/191 (13%) patients had abnormal thyroid function results. 10 patients had isolated low TSH, 1 had hypothyroidism. 1 had low TSH and FT3. 2 had isolated FT4 increase. 1 had FT4 increase and FT3 decrease. 10 had isolated low FT3.	Elevated CRP levels were associated with low levels of TSH and FT3. Low FT3 levels are associated with COVID-19 disease severity.	-ve (N = 12) +ve (N = 6)	-ve (N = 16) +ve (N = 2)	-ve (N = 15) +ve (N = 3)	Excluded	One required L-T4 replacement therapy.	17
	6	UK	Observational cohort longitudinal	334	Inpatients	Within 48 hours	289/334 (87%) patients were euthyroid. Patients with COVID-19 had a lower TSH and FT4 levels compared to those without COVID-19. TSH and FT4 levels were reduced at admission compared to pre-hospital baseline levels.	Increased CRP levels with lower TSH and higher FT4 levels were seen.	ND	ND	ND	Excluded	TSH levels recovered to pre-hospital baseline levels at follow-up without any specific treatments.	23
	7	Italy	Consecutive	85	Inpatients in ICU	Day 1	13 out of 85 (15%) patients were in overt thyrotoxicosis, suggesting as atypical subacute thyroiditis. FT4 levels were significantly higher in patients with HICU20 (mean ± SD=18.7 ± 5.4 pmol/l, range: 8.5-32.3) than those with LICU20 (13.5 ± 4.6 pmol/l, range: 4.5 - 19.2, p=0.016).	CRP levels were significantly increased in patients with HICU20.	-ve (N = 9)*	-ve (N = 8)* +ve (N = 1)*	-ve (N = 8)* +ve (N = 1)*	Excluded	No specific treatments	29
	8	Italy	Consecutive	287	Inpatients in non-ICU	Day 1	58/287 (20%) patients developed thyrotoxicosis. Out of the 58 thyrotoxic patients, thyrotoxicosis was clinically overt in 31 (53%). On the other hand, 15 out of the 287 (5%) had hypothyroidism.	In the entire group, there was a strong, inverse correlation between the serum levels of IL-6 and TSH (rho = -0.41, p < 0.001).	-ve (N = 9)	-ve (N = 9)	-ve (N = 9)	Excluded	Four patients treated with thiamazole 5mg/day, and 27 patients were observed among overt thyrotoxic patients.	24
	9	USA	Retrospective propensity-matched patients	251	Inpatients	Within 2 months	251/3703 (7%) patients had pre-existed hypothyroidism, receiving thyroid hormone replacement	ND	ND	ND	ND	Included	Hypothyroidism was not associated with increased risk of hospitalization, mechanical ventilation, or death.	18
	Footnotes:
	No, number; CRP, C-reactive protein; ESR, erythrocyte sedimentation rate; IL-6, interleukin-6;
	TRAb, anti-TSH receptor antibody (normal: <1.0 IU/l); TgAb, anti-thyroglobulin antibody; TPOAb, anti-thyroperoxidase antibody; L-T4, oral L-thyroxine supplemental therapy
	TSH, thyrotropin; FT3, free tri-iodothyronine; FT4, free thyroxine; NTIS, non-thyroidal-illness syndrome;
	-ve, negative; +ve, positive; ND, not determined, or not described; ICU, intensive care units; HICU, high-intensive care units; LICU, low-intensive care units.
	* Measured at initial follow-up (18-68 days after baseline mesurement on admission)
